# Supplementary material
Source: PubMed Central journal article supplement (PMC113852)
Supplement: nar_30_9_1967__1.pdf [file nar_30_9_1967__1.pdf]

Haugwitz et al., supplementary material

-1302  
cdc25Cmouse CTGGTC TGCTGCCACC ACCATCACTA AACCCGCCCC GTTCGCCGCC TTCTTCAAGC AGGATCTCAC  
TCTAGCCAC GGCAGATCT GGAACACT CTGTAGTGCA GGCTGTCCCT AACTCACGG CGACCCCTTT ATCTCCGTCT  
TCCAAGTGCT GGGATTATAG GCATGAAACC CTCCTGTCAT AAAGAATAC TCAAAAGGTT CCGTCCCTCT AATCTCCCTG  
AAAAGGAATT TCTATCCAGA AAACCTCTTG GAATGGGCCA GTGACAGCTC ATCATCAACA TGATCATGCT CCAACCACTG  
CCACACCAGC GGC AAGTGGT CCATTTCAG CCGAAAGGTA ACAAACCTCA AGAGGAATAA CGCGAGAAG AAGCAAGGAG  
AAGCGAATAC TTGATCCAAA AGCAGTCTT GAAGATAGTC AACGTTAGCG GGGCTCAATT TAAATCGCCC GGGGTCTTGT  
GGCGGAGAGA ATTTAGTACA AGGAAGGATG TGGCGATTGG CCAGAGGGAG AGCCAATATG TACCAGGCTC TCTGTATGGC

-756  
cdc25Cmouse GGAGCTGCC AGCGGACTAG GTACGAAAAT AGCGATTGGT TAGGGGGCGG GGTTCATGT... ..  
cdc25Chuman CTGCCTAACG CTGGTGGGCC AAACACTATC CTGCTCTGGC TATGGGGCGG GGCAAGTCTT ACCATTTCCA GAGCAAGCAC  
**Sp1/3** -772

-698  
cdc25Cmouse ..... TCTGGTGC GA TATTGGCTG ACGCTGCTAG  
cdc25Chuman ACGCCCCAG GTGATCTGCG AGCCCAACGA TAGGCCATGA GGCCCTGGGC GCGCGCGCGG AGATTGGCTG ACGCAGCTTA  
**NF-Y** **NF-Y** -692

-668  
cdc25Cmouse CAGGAGAGTG GTGATAGGTT GTT GAGAGAG TGAAGGTTT GAATGGTCAG AC .CTCTGGC TGTGGCTTT GCCTTC...  
cdc25Chuman GAGGCGAGCG GGGATAGGTT ACTGGGCTGG CGGAAGGTTT GAATGGTCAA CCGTGCAGC TGTGATATT ..CTTGTCTA  
**NF-Y** **CDE** **CHR** -614

-593  
cdc25Cmouse .AGGCCATCT CC..GGAGAG AAGAAGCAA GCTGAACCTC GGGCCACGTA GATGCAATTT TAACC... .GAAGAATCG  
cdc25Chuman GAGGCCGTAA CTTTGGCCTT CTGCTCAGGG AAGACTCTGA GTCCGACGTT GGCCTA... .CCAGTC GGAAGGCAGA  
-541

-521  
cdc25Cmouse CTTCGTTC TCAGATCCCT TGTCATTCTG TGGAGTCTTC GCTTACGTCC AGTCCTGCAG GAGGTTTTTT GTTTTTTTTT  
cdc25Chuman GCTGCAATCT AGTTAACTAC CTCCTTTCC CTAGATTTC TTTTATTCTG CTCAAGTCTT CGCCGGTGTG CGATCCCTAT  
-461

-441  
cdc25Cmouse TGTTTTTTTT TTGTTTTTTT AATCTCACAA AATTCAAGTC GGCCTTAA CTTAAGGTAA G.....CC GGAAGTGTG  
cdc25Chuman CTACTTTCTC TCCTTTGTA GGCAAGCCTC AGACTCCAGG CTTGAGGTAA GTCCGAGCC GTCTCCGCCA CGGAATCAGC  
-381

-368  
cdc25Cmouse TCCATCCCG AATCTAGGAT ACCCGATTGT CCCTGCAGGG TTC.....GT TCGGGAC..C CGAGATCCGT A.TAGCTCA  
cdc25Chuman GAGACCCCAT TGTCCTTCTT AGGGTCCAGT CGGGCCCCCA CAGACAGAGT TTGGGAGGCG CGA.ATGGGG ACTATCGCGA  
-302

-296  
cdc25Cmouse TCTTGTGTTG TAGATC.GGT TTCTT.CTGG TCAAGAGTGT GAAACTGCGT GGTCCGGATC AAGCCAGTGT ..TCTCTTCG  
cdc25Chuman ...G.TTAC GAGACCCGG TTCTTTCTAG TCAGGAGTCT CGAGTGTGT GGCCTGGAAC AAGTCAAAT CCTCTCTCA  
-227

-220  
cdc25Cmouse TTCCACCTTT GAAGTCTGTA GCTTGCCTGA CGTCTGTAAG TTTTCGCCCT GAGC..AA.C TGCAATGTAA CATTCCAAGA  
cdc25Chuman TTCCATCTTT AAGTCTCTAA GGTGCTCTCT CGTCCGTGAA TTCAGGTTCT AACCTTAAGC CAGGCTGTGA ATCACCTTCG  
-147

-143  
cdc25Cmouse .GGTTAAACC .CTTCATCTT ACCGGGATGC TCCTCCACCC GGGCTCAGCC GGGCACTGGA AAGGGTGGAG AGA.CTGGAG  
cdc25Chuman GGGTTGCCCC TCTTCCAGTG TTGATTCGCC TGGCTGAAA GGGTGGAGGA GTTTA..GGA AAG.CTG.AG GGAAGTCCGA  
-71

-66  
cdc25Cmouse TTGTTGAATA TCTGGAGTGT TCTTC.TCCT AGATAGCCCC ACCTCCCTCG GTG..AAGAC TCTGAAG.CC **ATG**  
cdc25Chuman TGTACCTGAT TTAGATGACG TTTTCTCTCT AGCTAGGTTT TGTTTTTCTC CTGGTGAGAA TTCGAAGACC **ATG**  
+1
